# Supplementary material for: Febuxostat, a Xanthine Oxidase Inhibitor, Decreased Macrophage Matrix Metalloproteinase Expression in Hypoxia
Source: PubMed Central journal article supplement (PMC7693746; doi:10.3390/biomedicines8110470), 2020-11-03
Supplement: biomedicines-08-00470-s001.pdf [file biomedicines-08-00470-s001.pdf]

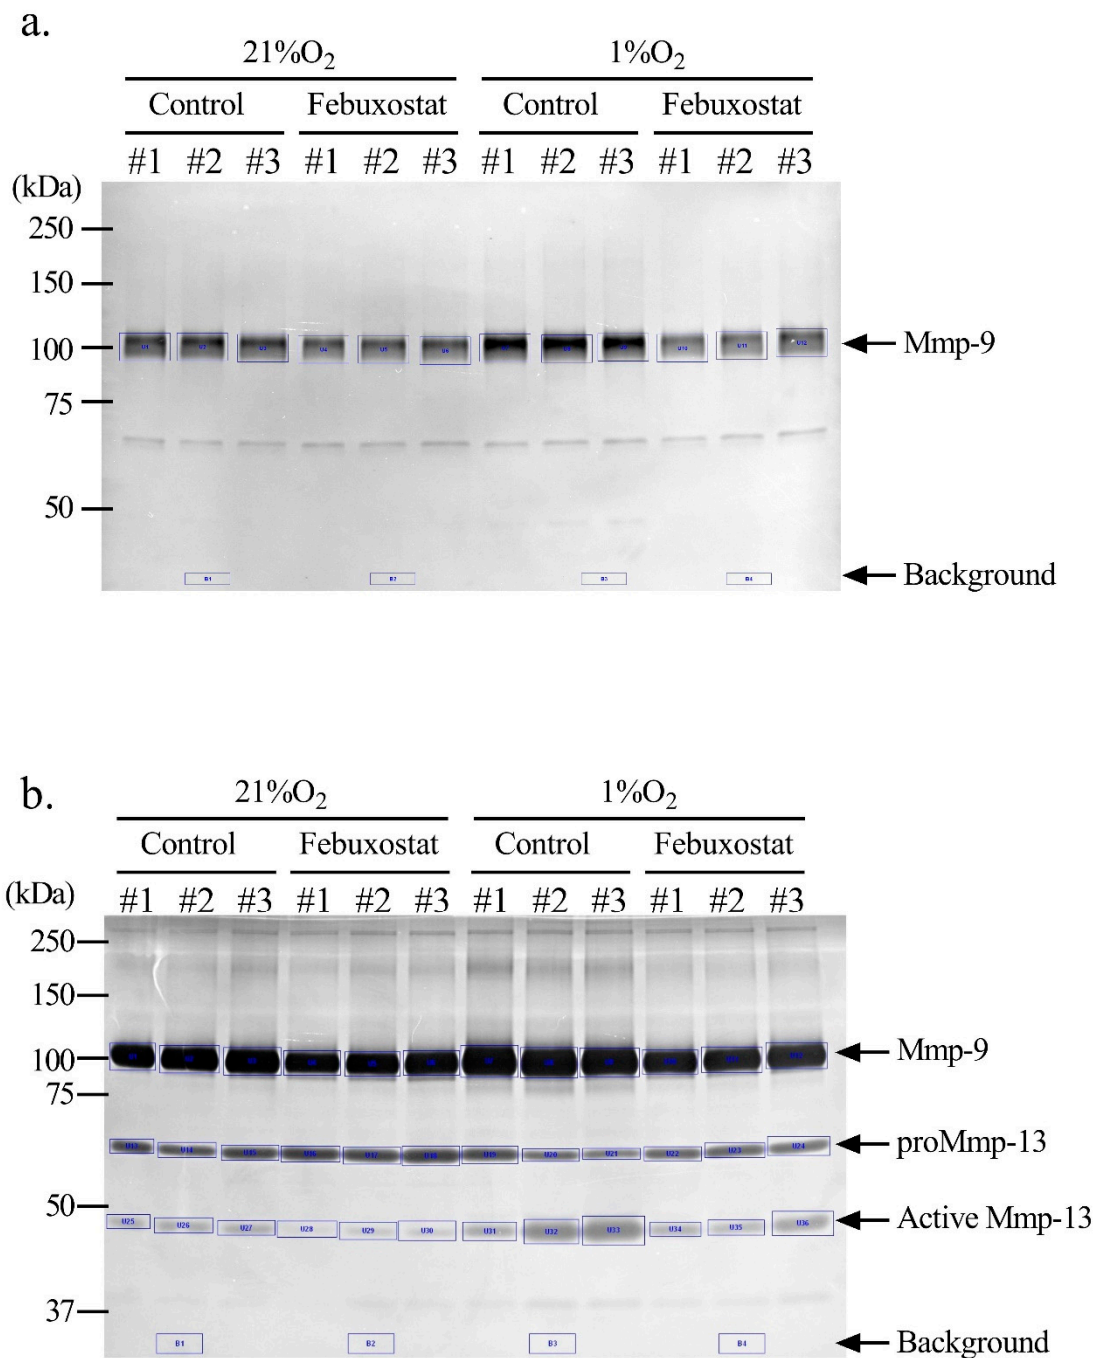

Supplementary Figure 2. Densitometry analysis of gelatin and collagen zymography. Representative images of in-gel zymography are shown. (a) gelatinolytic and (b) collagenolytic activities of the conditioned media were analyzed. Five micrograms of conditioned media were loaded onto a zymogram gel. Squares show how the set of bands from each lane was selected for densitometry.
